# Supplementary material for: Optimization of Natural Antioxidants Extraction from Pineapple Peel and Their Stabilization by Spray Drying
Source: MDPI journal article supplement (doi:10.3390/foods10061255), 2021-06-01
Supplement: s1 [file s1]

# Optimization of natural antioxidants extraction from pineapple peel and their stabilization by spray drying

Sofia C. Lourenço <sup>1</sup>, Débora A. Campos <sup>2</sup>, Ricardo Gómez-García <sup>2</sup>, Manuela Pintado <sup>2</sup>, M. Conceição Oliveira <sup>3</sup>, Diana I. Santos <sup>1</sup>, Luiz C. Corrêa-Filho <sup>1</sup>, Margarida Moldão-Martins <sup>1</sup>, and Vítor D. Alves <sup>1,\*</sup>

<sup>1</sup> LEAF, Linking Landscape, Environment, Agriculture and Food, Instituto Superior de Agronomia, Universidade de Lisboa, Tapada da Ajuda, 1349-017 Lisbon, Portugal; sofiaclourenco@isa.ulisboa.pt, dianaisasantos@isa.ulisboa.pt, lucaalbernaz@gmail.com, mmoldao@isa.ulisboa.pt

<sup>2</sup> Universidade Católica Portuguesa, CBQF - Centro de Biotecnologia e Química Fina – Laboratório Associado, Escola Superior de Biotecnologia, Rua Diogo Botelho 1327, 4169-005 Porto, Portugal; deborancampos@gmail.com, rgarcia@porto.ucp.pt, mpintado@porto.ucp.pt

<sup>3</sup> Centro de Química Estrutural, Instituto Superior Técnico, Universidade de Lisboa, Av. Rovisco Pais, 1049-001 Lisboa, Portugal; conceicao.oliveira@tecnico.ulisboa.pt

\* Correspondence: vitoralves@isa.ulisboa.pt; Tel.: +351-21-365-3546

## Supplementary Material

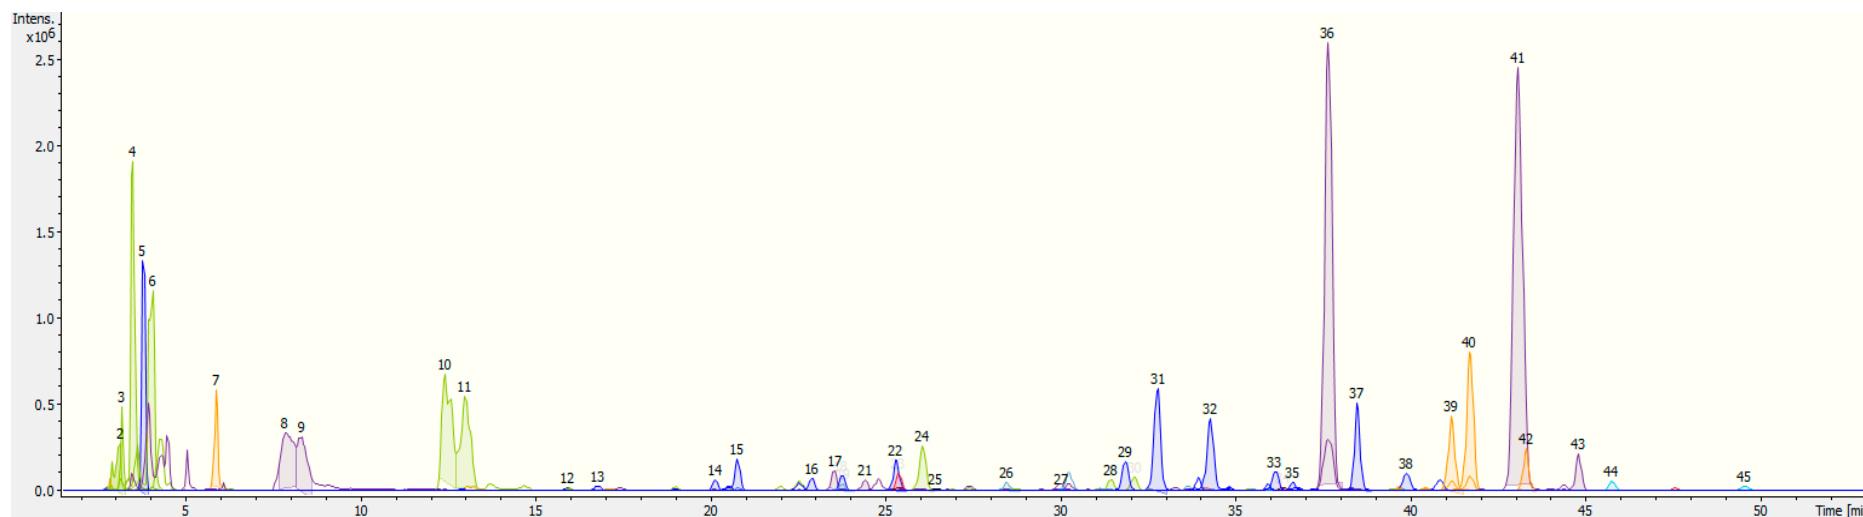

**Figure S1.** UHPLC-HRMS/MS total extract ion chromatogram acquired in the ESI negative mode of an E:W 80:20 extract of pineapple peel. For peak assignment, see Table S1.

**Table S1.** HPLC-ESI-HRMS/MS identification of main polyphenolic compounds in E:W 80:20 extract of pineapple peel.

| Peak | $t_R$<br>min | $\lambda$ max | Proposed<br>structure                                           | [M-H] <sup>-</sup> |           | $\Delta$<br>(ppm) | MS <sup>2</sup><br>[(m/z) ( $\Delta$ ppm) (attribution) (%)]                                                                                                                                                               | Proposed compound                                        |
|------|--------------|---------------|-----------------------------------------------------------------|--------------------|-----------|-------------------|----------------------------------------------------------------------------------------------------------------------------------------------------------------------------------------------------------------------------|----------------------------------------------------------|
|      |              |               |                                                                 | Calc. m/z          | Meas. m/z |                   |                                                                                                                                                                                                                            |                                                          |
| 1    | 2.87         | n.d           | C <sub>10</sub> H <sub>16</sub> N <sub>2</sub> O <sub>7</sub>   | 275.0885           | 275.0890  | (-1.9)            | 213.0862 (-7.9) [C <sub>9</sub> H <sub>13</sub> N <sub>2</sub> O <sub>4</sub> ]- (40)<br>128.0369 (-8.8) [C <sub>5</sub> H <sub>6</sub> NO <sub>3</sub> ]- (100)                                                           | Glutamyl-glutamic acid                                   |
| 2    | 3.16         | n.d           | C <sub>6</sub> H <sub>12</sub> O <sub>6</sub>                   | 179.0561           | 179.0560  | (0.4)             | 161.0454 (0.8) [C <sub>6</sub> H <sub>9</sub> O <sub>5</sub> ]- (40)<br>113.0239 (4.8)[C <sub>5</sub> H <sub>5</sub> O <sub>3</sub> ]- (100)                                                                               | Galactose                                                |
| 3    | 3.20         | n.d           | C <sub>12</sub> H <sub>20</sub> O <sub>12</sub>                 | 355.0882           | 355.0887  | (-1.5)            | 293.0886 (-2.7) [C <sub>11</sub> H <sub>17</sub> O <sub>9</sub> ]- (15)<br>161.0450 (3.5) [C <sub>6</sub> H <sub>9</sub> O <sub>5</sub> ]- (60)<br>179.0563 (-1,1) [C <sub>6</sub> H <sub>11</sub> O <sub>6</sub> ]- (100) | 3-O- $\beta$ -D-<br>Galactopyranuronosyl-<br>D-galactose |
| 4    | 3.53         | n.d           | C <sub>6</sub> H <sub>10</sub> O <sub>8</sub>                   | 209.0303           | 209.0307  | (-2.1)            | 191.0197 (-0.7) [C <sub>6</sub> H <sub>7</sub> O <sub>7</sub> ]- (40)<br>115.0019(12.1) [C <sub>4</sub> H <sub>3</sub> O <sub>4</sub> ]- (100)                                                                             | Sacharic acid or isomers                                 |
| 5    | 3.81         | n.d           | C <sub>7</sub> H <sub>12</sub> O <sub>6</sub>                   | 191.0561           | 191.0560  | (0.7)             | 127.0414 (9.3) [C <sub>6</sub> H <sub>7</sub> O <sub>3</sub> ]- (100)                                                                                                                                                      | Quinic acid                                              |
| 6    | 4.09         | n.d           | C <sub>12</sub> H <sub>22</sub> O <sub>11</sub>                 | 341.1089           | 341.1090  | (-0.3)            | 179.0557 (2.1) [C <sub>6</sub> H <sub>11</sub> O <sub>6</sub> ]- (100)                                                                                                                                                     | Sucrose or isomers                                       |
| 7    | 5.90         | n.d           | C <sub>10</sub> H <sub>17</sub> N <sub>3</sub> O <sub>6</sub> S | 306.0765           | 306.0772  | (-2.1)            | 128.0369 (-10.3) [C <sub>5</sub> H <sub>6</sub> NO <sub>3</sub> ]- (100)                                                                                                                                                   | D-d-Glutamyl-L-<br>cysteinglycine                        |
| 8    | 7.86         | n.d           | C <sub>6</sub> H <sub>8</sub> O <sub>7</sub>                    | 191.0197           | 191.0195  | (-1.0)            | 173.0094 (-1.2) [C <sub>6</sub> H <sub>5</sub> O <sub>6</sub> ]- (20)<br>111.0097 (-8.2) [C <sub>5</sub> H <sub>3</sub> O <sub>3</sub> ]- (100)                                                                            | Citric acid                                              |

| Peak | t <sub>R</sub><br>min | λ max | Proposed<br>structure                           | [M-H] <sup>-</sup> |           | Δ<br>(ppm) | MS <sup>2</sup><br>[(m/z) (Δ ppm) (attribution) (%)]                                                                                                                                                                                                                                                                                                       | Proposed compound                                                                              |
|------|-----------------------|-------|-------------------------------------------------|--------------------|-----------|------------|------------------------------------------------------------------------------------------------------------------------------------------------------------------------------------------------------------------------------------------------------------------------------------------------------------------------------------------------------------|------------------------------------------------------------------------------------------------|
|      |                       |       |                                                 | Calc. m/z          | Meas. m/z |            |                                                                                                                                                                                                                                                                                                                                                            |                                                                                                |
| 9    | 8.35                  | n.d   | C <sub>6</sub> H <sub>8</sub> O <sub>7</sub>    | 191.0197           | 191.0198  | (-0.5)     | 173.0096 (-2.2) [C <sub>6</sub> H <sub>5</sub> O <sub>6</sub> ] <sup>-</sup> (100)                                                                                                                                                                                                                                                                         | Isocitric acid                                                                                 |
| 10   | 12.44                 | n.d   | C <sub>18</sub> H <sub>30</sub> O <sub>15</sub> | 485.1512           | 485.1512  | (-0.0)     | 425.1297 (0.8) [C <sub>16</sub> H <sub>25</sub> O <sub>13</sub> ] <sup>-</sup> (20)<br><br>365.1096 (-1.7) [C <sub>14</sub> H <sub>21</sub> O <sub>11</sub> ] <sup>-</sup> (40)<br>221.0668 (-0.6) [C <sub>8</sub> H <sub>13</sub> O <sub>7</sub> ] <sup>-</sup> (100)<br>161.0455 (0.1) [C <sub>6</sub> H <sub>9</sub> O <sub>5</sub> ] <sup>-</sup> (40) | a-D-Glucopyranuronosyl-(1→2)-6-deoxy-a-L-galactopyranosyl-(1→3)-deoxy-L-galactopyranose        |
| 11   | 13.01                 | n.d   | C <sub>18</sub> H <sub>30</sub> O <sub>15</sub> | 485.1512           | 485.1515  | (-0.6)     | 221.0669 (-0.6) [C <sub>8</sub> H <sub>13</sub> O <sub>7</sub> ] <sup>-</sup> (100)<br><br>179.0562 (-0.6) [C <sub>6</sub> H <sub>16</sub> O <sub>6</sub> ] <sup>-</sup> (40)<br>161.0455 (0.1) [C <sub>6</sub> H <sub>9</sub> O <sub>5</sub> ] <sup>-</sup> (40)                                                                                          | a-D-Glucopyranuronosyl-(1→2)-6-deoxy-a-L-galactopyranosyl-(1→3)-deoxy-L-galactopyranose isomer |
| 12   | 15.96                 | n.d   | C <sub>15</sub> H <sub>16</sub> O <sub>11</sub> | 371.0620           | 371.0625  | (-1.4)     | 209.0302 (0.5) [C <sub>6</sub> H <sub>9</sub> O <sub>8</sub> ] <sup>-</sup> (100)<br>191.0194 (1.9) [C <sub>6</sub> H <sub>7</sub> O <sub>7</sub> ] <sup>-</sup> (60)                                                                                                                                                                                      | Caffeoylglucaric acid                                                                          |
| 13   | 16.82                 | n.d   | C <sub>14</sub> H <sub>18</sub> O <sub>9</sub>  | 329.0878           | 329.0884  | (-1.6)     | 167.0355 (1.1) [C <sub>8</sub> H <sub>7</sub> O <sub>4</sub> ] <sup>-</sup> (100)                                                                                                                                                                                                                                                                          | Vanilloyl-hexoside                                                                             |
| 14   | 20.18                 | n..d  | C <sub>14</sub> H <sub>18</sub> O <sub>9</sub>  | 329.0878           | 329.0886  | (-2.6)     | 167.0352 (1.1) [C <sub>8</sub> H <sub>7</sub> O <sub>4</sub> ] <sup>-</sup> (70)<br>152.0112 (1.9) (C <sub>7</sub> H <sub>4</sub> O <sub>4</sub> ) <sup>-</sup> (100)                                                                                                                                                                                      | Vanilloyl-hexoside isomer                                                                      |

| Peak | t <sub>R</sub><br>min | λ max | Proposed<br>structure                           | [M-H] <sup>-</sup> |           | Δ<br>(ppm) | MS <sup>2</sup><br>[(m/z) (Δ ppm) (attribution) (%)]                                                                                                                      | Proposed compound                               |
|------|-----------------------|-------|-------------------------------------------------|--------------------|-----------|------------|---------------------------------------------------------------------------------------------------------------------------------------------------------------------------|-------------------------------------------------|
|      |                       |       |                                                 | Calc. m/z          | Meas. m/z |            |                                                                                                                                                                           |                                                 |
| 15   | 20.80                 | n.d   | C <sub>14</sub> H <sub>20</sub> O <sub>8</sub>  | 315.1085           | 315.1090  | (-1.3)     | 135.0434 (12.0) [C <sub>8</sub> H <sub>7</sub> O <sub>2</sub> ] <sup>-</sup> (100)                                                                                        | (3,4-Dihydroxyphenyl)ethyl<br>D-glucopyranoside |
| 16   | 22.92                 | n.d   | C <sub>14</sub> H <sub>18</sub> O <sub>9</sub>  | 329.0878           | 329.0886  | (-2.6)     | 167.0355 (1.1) [C <sub>8</sub> H <sub>7</sub> O <sub>4</sub> ] <sup>-</sup> (70)<br>123.0452 (8.9) [C <sub>7</sub> H <sub>7</sub> O <sub>2</sub> ] <sup>-</sup> (100)     | Vanilloyl-hexoside<br>isomer                    |
| 17   | 23.57                 | n.d   | C <sub>8</sub> H <sub>12</sub> O <sub>7</sub>   | 219.0510           | 219.0515  | (-2.3)     | 111.0092 (-4.3) [C <sub>5</sub> H <sub>3</sub> O <sub>3</sub> ] <sup>-</sup> (100)                                                                                        | Dimethyl citrate                                |
| 18   | 23.78                 | n.d   | C <sub>15</sub> H <sub>20</sub> O <sub>10</sub> | 359.0984           | 359.0988  | (-1.3)     | 197.0456 (-0.5) [C <sub>9</sub> H <sub>9</sub> O <sub>5</sub> ] <sup>-</sup> (100)                                                                                        | Glucosyringic acid                              |
| 19   | 23.82                 | n.d   | C <sub>16</sub> H <sub>18</sub> O <sub>11</sub> | 385.0776           | 385.0779  | (-0.7)     | 193.0490 (8.5) [C <sub>10</sub> H <sub>9</sub> O <sub>4</sub> ] <sup>-</sup> (80)<br>134.0365 (6.5) [C <sub>8</sub> H <sub>6</sub> O <sub>2</sub> ] <sup>-</sup> (100)    | O-Feruloylaldarate                              |
| 20   | 24.10                 | n.d   | C <sub>16</sub> H <sub>28</sub> O <sub>11</sub> | 395.1559           | 395.1562  | (-0.7)     | 251.1148 (-4.6) [C <sub>10</sub> H <sub>19</sub> O <sub>7</sub> ] <sup>-</sup> (100)<br>161.0458 (-1.7) [C <sub>6</sub> H <sub>9</sub> O <sub>5</sub> ] <sup>-</sup> (50) | 1-(3-Methylbutanoyl)-6-<br>Apiosylglucose       |
| 21   | 24.47                 | n.d   | C <sub>15</sub> H <sub>18</sub> O <sub>9</sub>  | 341.0878           | 341.0877  | (0.3)      | 221.0460 (-2.0) [C <sub>11</sub> H <sub>9</sub> O <sub>5</sub> ] <sup>-</sup> (40)<br>161.0247 (-1.5) [C <sub>9</sub> H <sub>5</sub> O <sub>3</sub> ] <sup>-</sup> (100)  | Caffeoyl glucose                                |
| 22   | 25.32                 | n.d   | C <sub>15</sub> H <sub>20</sub> O <sub>10</sub> | 359.0984           | 359.0988  | (-1.1)     | 239.0564 (-1.5) [C <sub>11</sub> H <sub>11</sub> O <sub>6</sub> ] <sup>-</sup> (80)<br>197.0452 (1.6) [C <sub>9</sub> H <sub>9</sub> O <sub>5</sub> ] <sup>-</sup> (100)  | Glucosyringic acid<br>isomer                    |

| Peak | t <sub>R</sub><br>min | λ max | Proposed<br>structure                            | [M-H] <sup>-</sup> |           | Δ<br>(ppm) | MS <sup>2</sup>                                                                                                                                                           |  | Proposed compound                                 |
|------|-----------------------|-------|--------------------------------------------------|--------------------|-----------|------------|---------------------------------------------------------------------------------------------------------------------------------------------------------------------------|--|---------------------------------------------------|
|      |                       |       |                                                  | Calc. m/z          | Meas. m/z |            | [(m/z) (Δ ppm) (attribution) (%)]                                                                                                                                         |  |                                                   |
| 23   | 25.40                 | n.d   | C <sub>14</sub> H <sub>20</sub> O <sub>7</sub>   | 299.1136           | 299.1143  | (-2.1)     | 119.0516 (12.1) [C <sub>8</sub> H <sub>7</sub> O] <sup>-</sup> (100)                                                                                                      |  | 2-(3-hydroxyphenyl)ethanol<br>1'-glucoside        |
| 24   | 26.00                 | n.d   | C <sub>14</sub> H <sub>19</sub> NO <sub>10</sub> | 360.0936           | 360.0937  | (-0.1)     | 249.0625 (-3.8) [C <sub>9</sub> H <sub>13</sub> O <sub>8</sub> ] <sup>-</sup> (100)<br>110.0253 (-12.2)[C <sub>5</sub> H <sub>4</sub> NO <sub>2</sub> ] <sup>-</sup> (50) |  | 1-(Pyrrole-2-carboxyl)-<br>glucuronosylglycerol   |
| 25   | 26.46                 | n.d   | C <sub>13</sub> H <sub>16</sub> O <sub>10</sub>  | 331.0671           | 331.0671  | (-0.1)     | 168.0060 (2.7) [C <sub>7</sub> H <sub>4</sub> O <sub>5</sub> ] <sup>-</sup> (100)<br>125.0256 (-7.6) [C <sub>6</sub> H <sub>5</sub> O <sub>3</sub> ] <sup>-</sup> (60)    |  | Galloylglucose                                    |
| 26   | 28.50                 | n.d   | C <sub>16</sub> H <sub>18</sub> O <sub>11</sub>  | 385.0776           | 385.0778  | (-0.5)     | 193.0519 (-6.6) [C <sub>10</sub> H <sub>9</sub> O <sub>4</sub> ] <sup>-</sup> (80)<br>134.0364 (7.1) [C <sub>8</sub> H <sub>6</sub> O <sub>2</sub> ] <sup>-</sup> (100)   |  | O-Feruloylgalactarate                             |
| 27   | 30.06                 | n.d   | C <sub>16</sub> H <sub>18</sub> O <sub>9</sub>   | 353.0878           | 353.0875  | (1.0)      | 191.0564 (-1.3) [C <sub>7</sub> H <sub>11</sub> O <sub>6</sub> ] <sup>-</sup> (100)                                                                                       |  | Caffeoylquinic acid                               |
| 28   | 31.46                 | n.d   | C <sub>14</sub> H <sub>20</sub> O <sub>9</sub>   | 331.1035           | 331.1036  | (-0.4)     | 167.0341 (5.0) [C <sub>8</sub> H <sub>7</sub> O <sub>4</sub> ] <sup>-</sup> (40)<br>127.0415 (-10.1) [C <sub>6</sub> H <sub>7</sub> O <sub>3</sub> ] <sup>-</sup> (100)   |  | (3,4,5-Trihydroxyphenyl)ethyl-<br>glucopyranoside |
| 29   | 31.88                 | n.d   | C <sub>16</sub> H <sub>20</sub> O <sub>9</sub>   | 355.1035           | 355.1032  | (0.7)      | 175.0399 (1.1) [C <sub>10</sub> H <sub>7</sub> O <sub>3</sub> ] <sup>-</sup> (80)<br>160.0164 (1.0) [C <sub>9</sub> H <sub>4</sub> O <sub>3</sub> ] <sup>-</sup> (100)    |  | Feruloylglucose                                   |

| Peak | t <sub>R</sub><br>min | λ max       | Proposed<br>structure                                         | [M-H] <sup>-</sup> |           | Δ<br>(ppm) | MS <sup>2</sup><br>[(m/z) (Δ ppm) (attribution) (%)]                                                                                                                                                                                                              | Proposed compound                                    |
|------|-----------------------|-------------|---------------------------------------------------------------|--------------------|-----------|------------|-------------------------------------------------------------------------------------------------------------------------------------------------------------------------------------------------------------------------------------------------------------------|------------------------------------------------------|
|      |                       |             |                                                               | Calc. m/z          | Meas. m/z |            |                                                                                                                                                                                                                                                                   |                                                      |
| 30   | 31.46                 | d.d         | C <sub>14</sub> H <sub>20</sub> O <sub>9</sub>                | 331.1035           | 331.1036  | (-0.4)     | 179.0351 (-0.5) [C <sub>9</sub> H <sub>7</sub> O <sub>4</sub> ] <sup>-</sup> (20)<br>127.0415 (-10.1) [C <sub>6</sub> H <sub>7</sub> O <sub>3</sub> ] <sup>-</sup> (100)                                                                                          | (3,4,5-Trihydroxyphenyl)ethyl-glucopyranoside isomer |
| 31   | 32.82                 | 328         | C <sub>17</sub> H <sub>22</sub> O <sub>10</sub>               | 385.1140           | 385.1147  | (-1.7)     | 205.0506 (0.3) [C <sub>11</sub> H <sub>9</sub> O <sub>4</sub> ] <sup>-</sup> (70)<br>190.0270 (0.8) [C <sub>10</sub> H <sub>6</sub> O <sub>4</sub> ] <sup>-</sup> (100)<br>175.0033 (2.0) [C <sub>9</sub> H <sub>3</sub> O <sub>4</sub> ] <sup>-</sup> (20)       | Sinapoylglucose                                      |
| 32   | 34.32                 | n.d         | C <sub>12</sub> H <sub>14</sub> O <sub>6</sub>                | 253.0718           | 253.0724  | (-2.4)     | 161.0243 (0.9) [C <sub>9</sub> H <sub>5</sub> O <sub>3</sub> ] <sup>-</sup> (100)<br>133.0283 (8.7) [C <sub>8</sub> H <sub>5</sub> O <sub>2</sub> ] <sup>-</sup> (90)                                                                                             | Caffeoyl glycerol                                    |
| 33   | 36.16                 | n.d         | C <sub>24</sub> H <sub>38</sub> O <sub>12</sub>               | 517.2291           | 517.2286  | (-0.9)     | 385.1863 (1.2) [C <sub>19</sub> H <sub>29</sub> O <sub>8</sub> ] <sup>-</sup> (20)<br>293.0887 (-2.9) [C <sub>11</sub> H <sub>17</sub> O <sub>9</sub> ] <sup>-</sup> (50)<br>205.1234 (-0.1) [C <sub>13</sub> H <sub>17</sub> O <sub>2</sub> ] <sup>-</sup> (100) | Vomifoliol 9-[xylosyl-(1->6)-glucoside]              |
| 34   | 36.41                 | n.d         | C <sub>16</sub> H <sub>18</sub> O <sub>8</sub>                | 337.0942           | 337.0927  | (0.7)      | 163.0401 (5.8) [C <sub>9</sub> H <sub>7</sub> O <sub>3</sub> ] <sup>-</sup> (100)                                                                                                                                                                                 | Coumaroylquinic acid                                 |
| 35   | 36.61                 | 212;<br>318 | C <sub>27</sub> H <sub>35</sub> N <sub>3</sub> O <sub>6</sub> | 496.2353           | 496.2449  | (0.4)      | 346.1774 (-0.4) [C <sub>18</sub> H <sub>24</sub> N <sub>3</sub> O <sub>4</sub> ] <sup>-</sup> (100)<br>149.0598 (-2.1) [C <sub>7</sub> H <sub>7</sub> N <sub>3</sub> O] <sup>-</sup> (20)                                                                         | N1,N10-Diferuloylspermidine                          |

| Peak | t <sub>R</sub><br>min | λ max       | Proposed<br>structure                                           | [M-H] <sup>-</sup> |           | Δ<br>(ppm) | MS <sup>2</sup><br>[(m/z) (Δ ppm) (attribution) (%)]                                                                                                                                                                                                                                                                                                                                                                                                                                                                      | Proposed compound                         |
|------|-----------------------|-------------|-----------------------------------------------------------------|--------------------|-----------|------------|---------------------------------------------------------------------------------------------------------------------------------------------------------------------------------------------------------------------------------------------------------------------------------------------------------------------------------------------------------------------------------------------------------------------------------------------------------------------------------------------------------------------------|-------------------------------------------|
|      |                       |             |                                                                 | Calc. m/z          | Meas. m/z |            |                                                                                                                                                                                                                                                                                                                                                                                                                                                                                                                           |                                           |
| 36   | 37.68                 | 214;<br>328 | C <sub>15</sub> H <sub>14</sub> O <sub>10</sub>                 | 353.0514           | 353.0518  | (-1.0)     | 191.0196 (0.7) [C <sub>6</sub> H <sub>7</sub> O <sub>7</sub> ] <sup>-</sup> (90)<br>173.0090 (1.1) [C <sub>6</sub> H <sub>5</sub> O <sub>6</sub> ] <sup>-</sup> (100)<br>154.9986 (-2.9 [C <sub>6</sub> H <sub>3</sub> O <sub>5</sub> ] <sup>-</sup> (20)<br>111.0105 (-11.8) [C <sub>5</sub> H <sub>3</sub> O <sub>3</sub> ] <sup>-</sup> (10)                                                                                                                                                                           | Caffeoyl-isocitric acid                   |
| 37   | 38.50                 | n.d         | C <sub>27</sub> H <sub>35</sub> N <sub>3</sub> O <sub>6</sub>   | 496.2453           | 496.2449  | (0.8)      | 346.1776 (-1.2) [C <sub>18</sub> H <sub>24</sub> N <sub>3</sub> O <sub>4</sub> ] <sup>-</sup> (100)<br>331.1534 (1.0) [C <sub>17</sub> H <sub>21</sub> N <sub>3</sub> O <sub>4</sub> ] <sup>-</sup> (80)                                                                                                                                                                                                                                                                                                                  | N1,N10-<br>Diferuloylspermidine<br>isomer |
| 38   | 39.94                 | 220;<br>306 | C <sub>16</sub> H <sub>20</sub> O <sub>10</sub>                 | 371.0984           | 371.0982  | (0.3)      | 249.0613 (1.2) [C <sub>9</sub> H <sub>13</sub> O <sub>8</sub> ] <sup>-</sup> (100)<br>217.0364 (10.2) [C <sub>8</sub> H <sub>9</sub> O <sub>7</sub> ] <sup>-</sup> (50)                                                                                                                                                                                                                                                                                                                                                   | Dihydroferulic acid 4-O-<br>glucuronide   |
| 39   | 41.20                 | 215;<br>268 | C <sub>20</sub> H <sub>27</sub> N <sub>3</sub> O <sub>8</sub> S | 468.1426           | 468.1437  | (-2.5)     | 306.0772 (-2.2) [C <sub>10</sub> H <sub>16</sub> N <sub>3</sub> O <sub>6</sub> S] <sup>-</sup> (80)<br>272.0895 (-2.4) [C <sub>10</sub> H <sub>14</sub> N <sub>3</sub> O <sub>6</sub> ] <sup>-</sup> (100)<br>254.0790 (-2.9) [C <sub>10</sub> H <sub>12</sub> N <sub>3</sub> O <sub>5</sub> ] <sup>-</sup> (85)<br>210.0889 (-2.2) [C <sub>9</sub> H <sub>12</sub> N <sub>3</sub> O <sub>3</sub> ] <sup>-</sup> (90)<br>179.0464 (-1.2) [C <sub>8</sub> H <sub>7</sub> N <sub>2</sub> O <sub>3</sub> ] <sup>-</sup> (40) | Coniferylglutathione                      |

| Peak | t <sub>R</sub><br>min | λ max       | Proposed<br>structure                                           | [M-H] <sup>-</sup> |           | Δ<br>(ppm) | MS <sup>2</sup><br>[(m/z) (Δ ppm) (attribution) (%)]                                                                                                                                                                                                                                                                                                                                                                                                                                                                     | Proposed compound                   |
|------|-----------------------|-------------|-----------------------------------------------------------------|--------------------|-----------|------------|--------------------------------------------------------------------------------------------------------------------------------------------------------------------------------------------------------------------------------------------------------------------------------------------------------------------------------------------------------------------------------------------------------------------------------------------------------------------------------------------------------------------------|-------------------------------------|
|      |                       |             |                                                                 | Calc. m/z          | Meas. m/z |            |                                                                                                                                                                                                                                                                                                                                                                                                                                                                                                                          |                                     |
| 40   | 41.72                 | 214;<br>278 | C <sub>21</sub> H <sub>29</sub> N <sub>3</sub> O <sub>9</sub> S | 498.1531           | 498.1547  | (-3.2)     | 306.0767 (-0.7) [C <sub>10</sub> H <sub>16</sub> N <sub>3</sub> O <sub>6</sub> S] <sup>-</sup> (80)<br>272.0892 (-1.5) [C <sub>10</sub> H <sub>14</sub> N <sub>3</sub> O <sub>6</sub> ] <sup>-</sup> (100)<br>254.0788 (-2.1) [C <sub>10</sub> H <sub>12</sub> N <sub>3</sub> O <sub>5</sub> ] <sup>-</sup> (85)<br>210.0886 (-0.8) [C <sub>9</sub> H <sub>12</sub> N <sub>3</sub> O <sub>3</sub> ] <sup>-</sup> (90)<br>179.0460 (1.4) [C <sub>8</sub> H <sub>7</sub> N <sub>2</sub> O <sub>3</sub> ] <sup>-</sup> (40) | S-sinapylglutathione                |
| 41   | 43.10                 | 210;<br>314 | C <sub>15</sub> H <sub>14</sub> O <sub>9</sub>                  | 337.0565           | 337.0564  | (0.3)      | 173.0092 (-0.4) [C <sub>6</sub> H <sub>5</sub> O <sub>6</sub> ] <sup>-</sup> (40)<br>163.0402 (-0.5) [C <sub>9</sub> H <sub>7</sub> O <sub>3</sub> ] <sup>-</sup> (30)<br>154.9988 (-1.5) [C <sub>6</sub> H <sub>3</sub> O <sub>6</sub> ] <sup>-</sup> (60)<br>111.0105 (-11.8) [C <sub>5</sub> H <sub>3</sub> O <sub>3</sub> ] <sup>-</sup> (100)                                                                                                                                                                       | p-Coumaroyl-isocitric acid          |
| 42   | 43.34                 | n.d         | C <sub>19</sub> H <sub>26</sub> N <sub>2</sub> O <sub>8</sub> S | 441.1337           | 441.1329  | (1.9)      | 249.0556 (-2.2) [C <sub>8</sub> H <sub>13</sub> N <sub>2</sub> O <sub>5</sub> S] <sup>-</sup> (20)<br>225.0595 (-2.0) [C <sub>11</sub> H <sub>13</sub> O <sub>3</sub> S] <sup>-</sup> (90)<br>171.0775 (-0.1) [C <sub>7</sub> N <sub>11</sub> N <sub>2</sub> O <sub>3</sub> ] <sup>-</sup> (100)<br>128.0382 (-8.9) [C <sub>5</sub> H <sub>6</sub> NO <sub>3</sub> ] <sup>-</sup> (60)                                                                                                                                   | N-L-d-Glutamyl-S-sinapyl-L-cysteina |
| 43   | 44.84                 | 215;<br>328 | C <sub>16</sub> H <sub>16</sub> O <sub>10</sub>                 | 367.0671           | 367.0665  | (1.6)      | 173.0094 (-1.2) [C <sub>6</sub> H <sub>5</sub> O <sub>6</sub> ] <sup>-</sup> (40)<br>154.9990 (-2.9) [C <sub>6</sub> H <sub>3</sub> O <sub>6</sub> ] <sup>-</sup> (70)<br>111.0105 (-11.8) [C <sub>5</sub> H <sub>3</sub> O <sub>3</sub> ] <sup>-</sup> (100)                                                                                                                                                                                                                                                            | p-Feruloyl-isocitric acid           |



| Peak | t <sub>R</sub><br>min | λ max | Proposed<br>structure                           | [M-H] <sup>-</sup> |           | Δ<br>(ppm) | MS <sup>2</sup><br>[(m/z) (Δ ppm) (attribution) (%)]                                                                                                                                                                                                                                                                                                          | Proposed compound     |       |
|------|-----------------------|-------|-------------------------------------------------|--------------------|-----------|------------|---------------------------------------------------------------------------------------------------------------------------------------------------------------------------------------------------------------------------------------------------------------------------------------------------------------------------------------------------------------|-----------------------|-------|
|      |                       |       |                                                 | Calc. m/z          | Meas. m/z |            |                                                                                                                                                                                                                                                                                                                                                               |                       |       |
| 44   | 45.78                 | n.d   | C <sub>27</sub> H <sub>30</sub> O <sub>17</sub> | 625.1410           | 625.1405  | (0.9)      | 463.0876 (1.4) [Y <sub>1</sub> ] <sup>-</sup> [C <sub>21</sub> H <sub>19</sub> O <sub>12</sub> ] <sup>-</sup> (100)<br>301.0352 (0.6) [Y <sub>0</sub> ] <sup>-</sup> [C <sub>15</sub> H <sub>9</sub> O <sub>7</sub> ] <sup>-</sup> (90)<br>300.0274 (0.4) [Y <sub>0</sub> -H] <sup>-</sup> (C <sub>15</sub> H <sub>8</sub> O <sub>7</sub> ) <sup>-</sup> (40) | Quercetin<br>hexoside | di-O- |
| 45   | 49.57                 | n.d   | C <sub>21</sub> H <sub>20</sub> O <sub>12</sub> | 463.0882           | 463.0877  | (1.0)      | 300.0282 (-2.1) [Y <sub>0</sub> -H] <sup>-</sup> (C <sub>15</sub> H <sub>8</sub> O <sub>7</sub> ) <sup>-</sup> (100)<br>271.0249 (-0.2) [C <sub>14</sub> H <sub>7</sub> O <sub>6</sub> ] <sup>-</sup> (20)                                                                                                                                                    | Quercetin             |       |
